# Supplementary material for: Consensus Guideline for the Management of Peritoneal Metastases in Patients with Neuroendocrine Neoplasms
Source: bioRxiv or medRxiv preprint supplement (doi:10.1101/2024.04.10.24305426), 2024-04-13
Supplement: Supplementary file [file media-1.pdf]

**Figure S1: Delphi Round 1 - Clinical Pathway for Management of Neuroendocrine Neoplasms with Peritoneal Metastases**

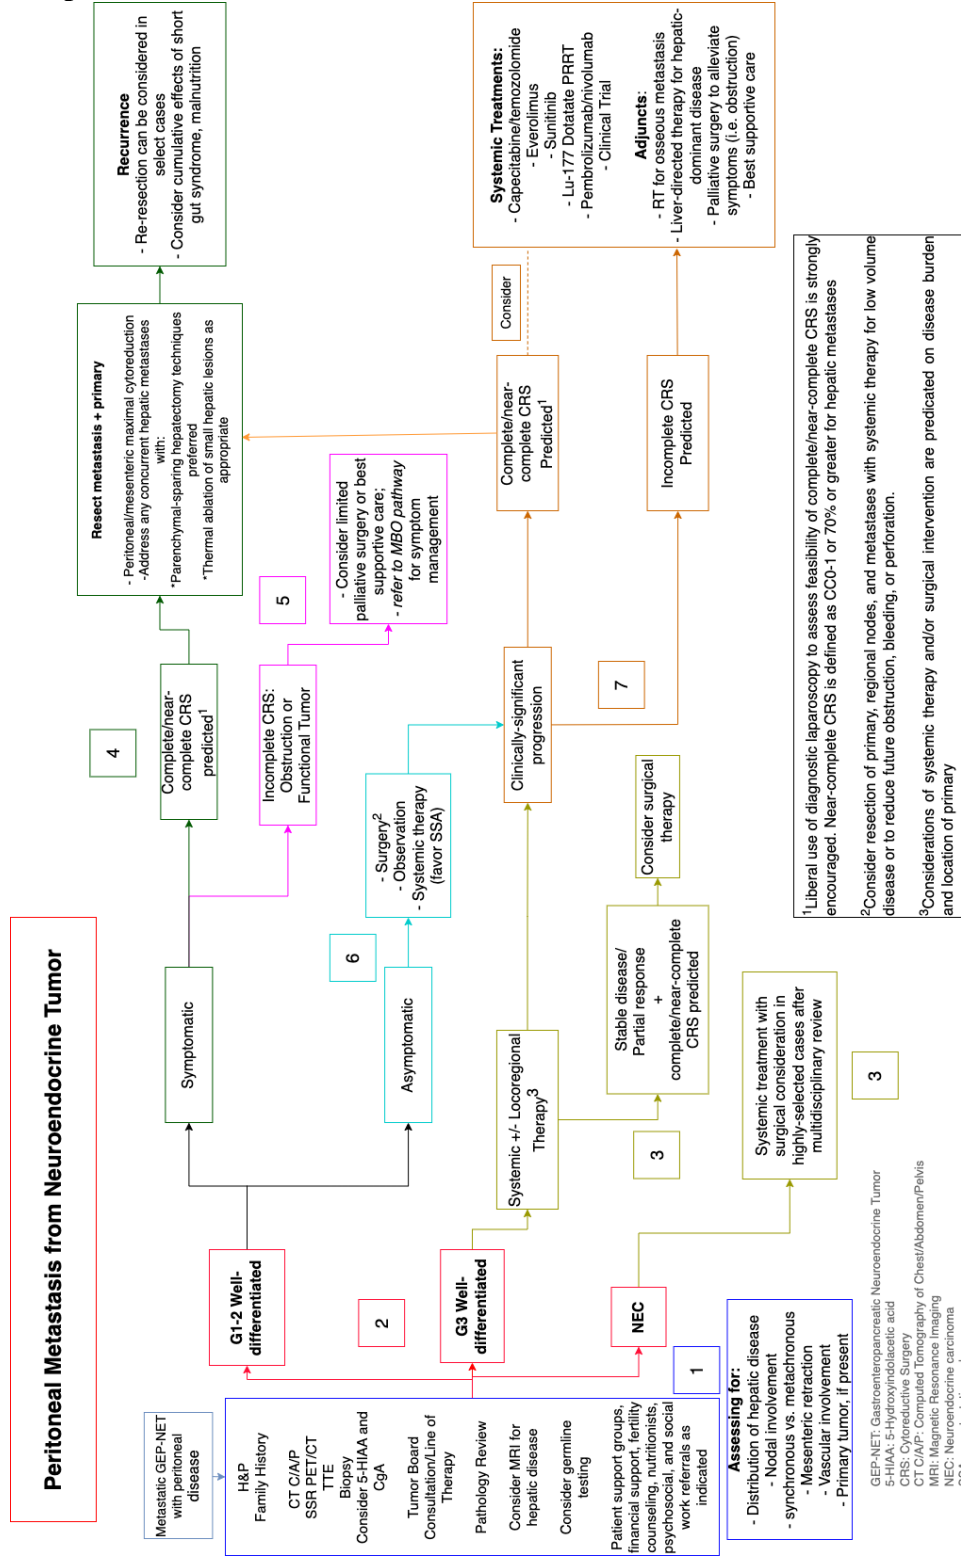

**Table S1: Quality Assessments**

| Author                | Selection | Comparability | Outcomes | Overall |
|-----------------------|-----------|---------------|----------|---------|
| Benhaim et al. [17]   | ***       | -             | ***      | *****   |
| Boer et al. [18]      | **        | -             | ***      | *****   |
| Elias et al. [19]     | ****      | -             | **       | *****   |
| Elias et al. [20]     | ****      | -             | ***      | *****   |
| Hajjar et al. [21]    | ****      | -             | ***      | *****   |
| Merola et al. [5]     | ****      | -             | ***      | *****   |
| Wonn et al. [4]       | ***       | -             | ***      | *****   |
| Wright et al. [22]    | ***       | -             | ***      | *****   |
| Strosberg et al. [23] | ***       | -             | ***      | *****   |

**Table S2: Search strategy for rapid review**

|   |                                                                                                                                                                                                                                   |
|---|-----------------------------------------------------------------------------------------------------------------------------------------------------------------------------------------------------------------------------------|
| 1 | periton*[TW] OR carcinomatosis[tw] OR "peritoneal neoplasms"[Mesh Major topic] OR HIPEC OR intraperitoneal chemotherapy[TW] OR "Hyperthermic intraperitoneal chemotherapy"[Mesh Major Topic] OR (periton*[tw] AND cytoreduc*[TW]) |
| 2 | "neuroendocrine tumor"[tw] OR "neuroendocrine tumors"[Mesh Major Topic] OR carcinoid*[tw] OR "Receptors, Peptide"[MeSH Major Topic] OR "peptide receptor"[tw] OR PRRT[tw] OR DOTATE[tw]                                           |
| 3 | #1 and #2                                                                                                                                                                                                                         |
